# Supplementary material for: Evaluation of the Effect of Photodynamic Therapy on CAM-Grown Sarcomas
Source: MDPI journal article supplement (doi:10.3390/bioengineering10040464), 2023-04-11
Supplement: s1 [file s1]

# Evaluation of the Effect of Photodynamic Therapy on CAM-Grown Sarcomas

Maximilian Kerkhoff <sup>1,2,3,\*</sup>, Susanne Grunewald <sup>2,3,4</sup>, Christiane Schaefer <sup>1,2,3</sup>, Stefan K. Zöllner <sup>1,2,3</sup>, Pauline Plaumann <sup>1,2,3</sup>, Maike Busch <sup>2,3,5</sup>, Nicole Dünker <sup>2,3,5</sup>, Julia Ketzer <sup>2,3,4</sup>, Josephine Kersting <sup>1,2,3</sup>, Sebastian Bauer <sup>2,3,4</sup>, Jendrik Harges <sup>2,3,6</sup>, Arne Streitbürger <sup>2,3,6</sup>, Uta Dirksen <sup>1,2,3</sup>, Wolfgang Hartmann <sup>7</sup> and Wiebke K. Guder <sup>2,3,6</sup>

<sup>1</sup> Pediatrics III, University Hospital Essen, West German Cancer Center, 45147 Essen, Germany; christiane.schaefer2@uk-essen.de (C.S.); stefan.zoellner@uk-essen.de (S.K.Z.); pauline.plaumann@uk-essen.de (P.P.); josephine.kersting@uk-essen.de (J.K.); uta.dirksen@uk-essen.de (U.D.)

<sup>2</sup> German Cancer Consortium (DKTK), Essen/Düsseldorf, University Hospital Essen, 45147 Essen, Germany; susanne.grunewald@uk-essen.de (S.G.); maike.busch@uk-essen.de (M.B.); nicole.duenker@uk-essen.de (N.D.); julia.ketzer@uk-essen.de (J.K.); sebastian.bauer@uk-essen.de (S.B.); jendrik.harges@uk-essen.de (J.H.); arne.streitbuenger@uk-essen.de (A.S.); wiebke.guder@uk-essen.de (W.K.G.)

<sup>3</sup> University Duisburg-Essen, 45141 Essen, Germany

<sup>4</sup> West German Cancer Center, University Hospital Essen, 45147 Essen, Germany

<sup>5</sup> Department of Neuroanatomy, Institute for Anatomy II, University of Duisburg Essen, University Medicine Essen, Essen, Germany

<sup>6</sup> Department of Orthopedic Oncology, University Hospital Essen, 45147 Essen, Germany

<sup>7</sup> Division of Translational Pathology, Gerhard-Domagk-Institute of Pathology, University Hospital Muenster, 48149 Muenster, Germany; wolfgang.hartmann@ukmuenster.de

\* Correspondence: maximilian.kerkhoff@uk-essen.de

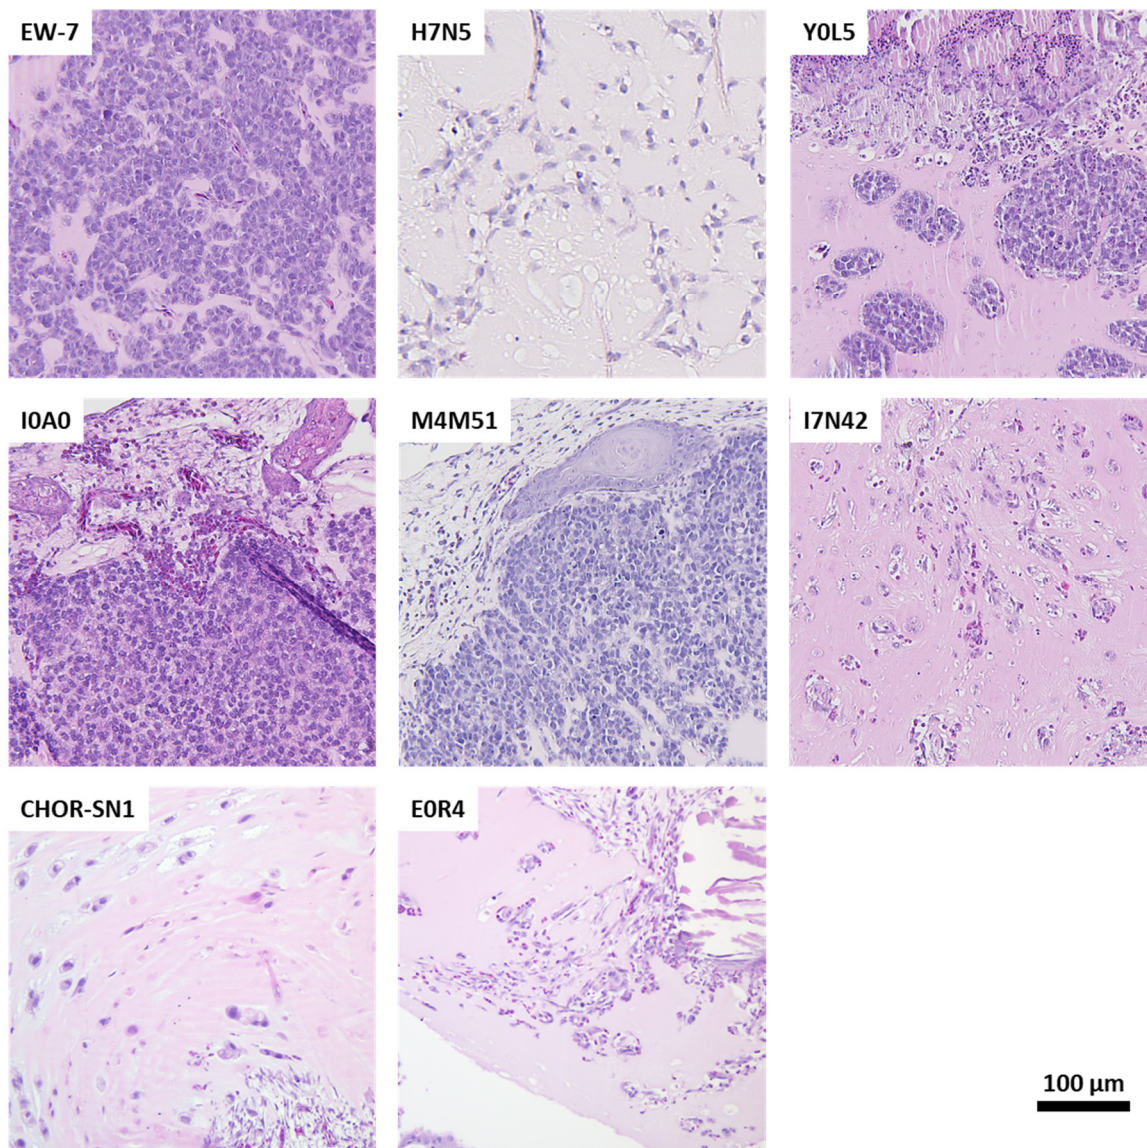

**Supplementary Figure S1. Histopathology of CDX tumors.** A) Histopathology of untreated CDX tumors of different sarcoma subtypes. Addition to Figure 3. Ewing Sarcoma: EW-7, Y0L5, I0A0, M4M51; Chondrosarcoma: H7N5; DSRCT: I7N42; Chordoma: CHOR-SN1; Giant Cell Tumor of Bone: E0R4.
